# Supplementary material
Source: PubMed Central journal article supplement (PMC2876009)
Supplement: mcq066_1.pdf [file mcq066_1.pdf]

## SUPPLEMENTARY DATA

TABLE S1. Mean trait values for each species in the C<sup>-</sup>N<sup>+</sup> treatment ( $n = 39$ ). Different letters in the same column indicate significant differences between species at  $P < 0.05$  in a multiple range test with the LSD method (one-way ANOVA). Standard error of means (s.e.m) and coefficient of variation (CV) are shown. See Table 1 in the main text for trait codes and Fig. 2 for the species' codes.

| Species    | LDMC<br>(mg d. wt g <sup>-1</sup><br>f. wt) | SLA<br>(m <sup>2</sup> kg <sup>-1</sup> ) | LL<br>(mm)         | LLS<br>(°Cd)       | LNCF<br>(mg g <sup>-1</sup> ) | NM<br>(tiller <sup>-1</sup> ) | SL<br>(mm)        | VE<br>(mm)          | ME<br>(cm)       | CC<br>(g kg <sup>-1</sup> ) | ADF<br>(g kg <sup>-1</sup> ) | EG                 | BF<br>(°Cd)       | TD<br>(m <sup>-2</sup> ) |
|------------|---------------------------------------------|-------------------------------------------|--------------------|--------------------|-------------------------------|-------------------------------|-------------------|---------------------|------------------|-----------------------------|------------------------------|--------------------|-------------------|--------------------------|
| <i>Ap</i>  | 230 <sup>bcd</sup>                          | 25 <sup>bcd</sup>                         | 211 <sup>c</sup>   | 437 <sup>cde</sup> | 10.7 <sup>ab</sup>            | 2.71 <sup>bc</sup>            | 113 <sup>a</sup>  | 346 <sup>c</sup>    | 90 <sup>d</sup>  | 440 <sup>f</sup>            | 261 <sup>a</sup>             | 4.3 <sup>a</sup>   | 619 <sup>k</sup>  | 2577 <sup>c</sup>        |
| <i>Ao</i>  | 208 <sup>efg</sup>                          | 27 <sup>bc</sup>                          | 150 <sup>def</sup> | 533 <sup>bcd</sup> | 9.92 <sup>bc</sup>            | 2.41 <sup>de</sup>            | 56 <sup>gh</sup>  | 213 <sup>fg</sup>   | 63 <sup>f</sup>  | 537 <sup>b</sup>            | 197 <sup>g</sup>             | 3.7 <sup>bcd</sup> | 623 <sup>j</sup>  | 4809 <sup>bc</sup>       |
| <i>Ae</i>  | 195 <sup>gh</sup>                           | 32 <sup>a</sup>                           | 165 <sup>def</sup> | 476 <sup>bcd</sup> | 10.2 <sup>abc</sup>           | 2.44 <sup>cde</sup>           | 78 <sup>de</sup>  | 262 <sup>de</sup>   | 127 <sup>a</sup> | 514 <sup>bc</sup>           | 223 <sup>cdef</sup>          | 4.1 <sup>ab</sup>  | 953 <sup>d</sup>  | 2949 <sup>c</sup>        |
| <i>Dg</i>  | 216 <sup>de</sup>                           | 24 <sup>cde</sup>                         | 274 <sup>b</sup>   | 353 <sup>de</sup>  | 9.42 <sup>cd</sup>            | 2.53 <sup>bcd</sup>           | 107 <sup>ab</sup> | 404 <sup>b</sup>    | 114 <sup>b</sup> | 449 <sup>f</sup>            | 257 <sup>ab</sup>            | 2.9 <sup>fg</sup>  | 873 <sup>f</sup>  | 2510 <sup>c</sup>        |
| <i>Er</i>  | 212 <sup>ef</sup>                           | 28 <sup>b</sup>                           | 168 <sup>de</sup>  | 376 <sup>cde</sup> | 11.0 <sup>a</sup>             | 2.53 <sup>bcd</sup>           | 73 <sup>ef</sup>  | 274 <sup>d</sup>    | 99 <sup>c</sup>  | 469 <sup>ef</sup>           | 234 <sup>cd</sup>            | 4.1 <sup>ab</sup>  | 1217 <sup>a</sup> | 2600 <sup>c</sup>        |
| <i>Fa</i>  | 215 <sup>e</sup>                            | 18 <sup>f</sup>                           | 346 <sup>a</sup>   | 494 <sup>bcd</sup> | 8.11 <sup>e</sup>             | 1.99 <sup>f</sup>             | 95 <sup>bc</sup>  | 455 <sup>a</sup>    | 118 <sup>b</sup> | 508 <sup>cd</sup>           | 219 <sup>def</sup>           | 3.0 <sup>ef</sup>  | 873 <sup>f</sup>  | 2379 <sup>c</sup>        |
| <i>Fr</i>  | 250 <sup>a</sup>                            | 12 <sup>g</sup>                           | 157 <sup>def</sup> | 707 <sup>ab</sup>  | 9.92 <sup>bc</sup>            | 2.70 <sup>bc</sup>            | 50 <sup>hi</sup>  | 228 <sup>defg</sup> | 77 <sup>e</sup>  | 452 <sup>f</sup>            | 240 <sup>bc</sup>            | 2.5 <sup>g</sup>   | 678 <sup>i</sup>  | 10083 <sup>a</sup>       |
| <i>Hl</i>  | 186 <sup>h</sup>                            | 33 <sup>a</sup>                           | 159 <sup>def</sup> | 304 <sup>de</sup>  | 8.53 <sup>e</sup>             | 2.38 <sup>de</sup>            | 90 <sup>cd</sup>  | 266 <sup>d</sup>    | 98 <sup>cd</sup> | 500 <sup>cd</sup>           | 229 <sup>cde</sup>           | 3.4 <sup>cde</sup> | 897 <sup>e</sup>  | 3646 <sup>c</sup>        |
| <i>Lp</i>  | 198 <sup>fgh</sup>                          | 23 <sup>de</sup>                          | 175 <sup>d</sup>   | 408 <sup>cde</sup> | 8.64 <sup>de</sup>            | 2.42 <sup>de</sup>            | 63 <sup>fgh</sup> | 264 <sup>d</sup>    | 76 <sup>e</sup>  | 536 <sup>b</sup>            | 208 <sup>fg</sup>            | 3.5 <sup>cd</sup>  | 1093 <sup>c</sup> | 4498 <sup>bc</sup>       |
| <i>Php</i> | 216 <sup>de</sup>                           | 31 <sup>a</sup>                           | 142 <sup>ef</sup>  | 260 <sup>e</sup>   | 10.3 <sup>abc</sup>           | 2.73 <sup>b</sup>             | 65 <sup>efg</sup> | 214 <sup>efg</sup>  | 72 <sup>e</sup>  | 487 <sup>dc</sup>           | 227 <sup>cde</sup>           | 3.8 <sup>bc</sup>  | 1174 <sup>b</sup> | 3922 <sup>c</sup>        |
| <i>Pp</i>  | 232 <sup>bc</sup>                           | 21 <sup>ef</sup>                          | 179 <sup>cd</sup>  | 769 <sup>a</sup>   | 9.85 <sup>bc</sup>            | 2.23 <sup>ef</sup>            | 61 <sup>fgh</sup> | 256 <sup>def</sup>  | 77 <sup>e</sup>  | 493 <sup>cde</sup>          | 226 <sup>cde</sup>           | 3.4 <sup>cde</sup> | 761 <sup>g</sup>  | 6645 <sup>b</sup>        |
| <i>Pt</i>  | 236 <sup>ab</sup>                           | 27 <sup>bc</sup>                          | 64 <sup>g</sup>    | 372 <sup>cde</sup> | 10.6 <sup>ab</sup>            | 3.16 <sup>a</sup>             | 36 <sup>i</sup>   | 102 <sup>h</sup>    | 60 <sup>f</sup>  | 568 <sup>a</sup>            | 177 <sup>h</sup>             | 3.2 <sup>def</sup> | 703 <sup>h</sup>  | 4739 <sup>bc</sup>       |
| <i>Tf</i>  | 221 <sup>cde</sup>                          | 27 <sup>b</sup>                           | 132 <sup>f</sup>   | 604 <sup>abc</sup> | 10.4 <sup>ab</sup>            | 2.53 <sup>bcd</sup>           | 63 <sup>fgh</sup> | 205 <sup>g</sup>    | 74 <sup>e</sup>  | 514 <sup>b</sup>            | 213 <sup>efg</sup>           | 3.4 <sup>cde</sup> | 897 <sup>e</sup>  | 3649 <sup>c</sup>        |
| s.e.m      | 1.4                                         | 0.29                                      | 3.2                | 31.6               | 0.08                          | 0.03                          | 1.4               | 4.7                 | 2.0              | 2.5                         | 1.8                          | 0.05               | 54.2              | 245.1                    |
| CV (%)     | 8.6                                         | 23                                        | 39                 | 32                 | 9.1                           | 11                            | 31                | 34                  | 23               | 7.7                         | 11                           | 15                 | 22                | 51                       |
